# Supplementary material
Source: PubMed Central journal article supplement (PMC4120067)
Supplement: NIHMS608783-supplement-supporting_info.pdf [file NIHMS608783-supplement-supporting_info.pdf]

## **SUPPLEMENTARY MATERIALS**

### **Elastomeric microposts integrated into microfluidics for flow-mediated endothelial mechanotransduction analysis**

Raymond H. W. Lam<sup>1,2,3</sup>, Yubing Sun<sup>1,2</sup>, Weiqiang Chen<sup>1,2</sup>, and Jianping Fu<sup>1,2,4,\*</sup>

<sup>1</sup>Integrated Biosystems and Biomechanics Laboratory, University of Michigan, Ann Arbor, MI 48105, USA; <sup>2</sup>Department of Mechanical Engineering, University of Michigan, Ann Arbor, MI 48105, USA; <sup>3</sup>Department of Mechanical and Biomedical Engineering, City University of Hong Kong, Hong Kong; <sup>4</sup>Department of Biomedical Engineering, University of Michigan, Ann Arbor, MI 48105, USA.

\*Correspondence should be addressed to J. Fu [J. Fu (email address: [jpfu@umich.edu](mailto:jpfu@umich.edu), Tel: 01-734-615-7363, Fax: 01-734-647-7303)].

# A. Supplemental Figures

## Supplemental Figure S1

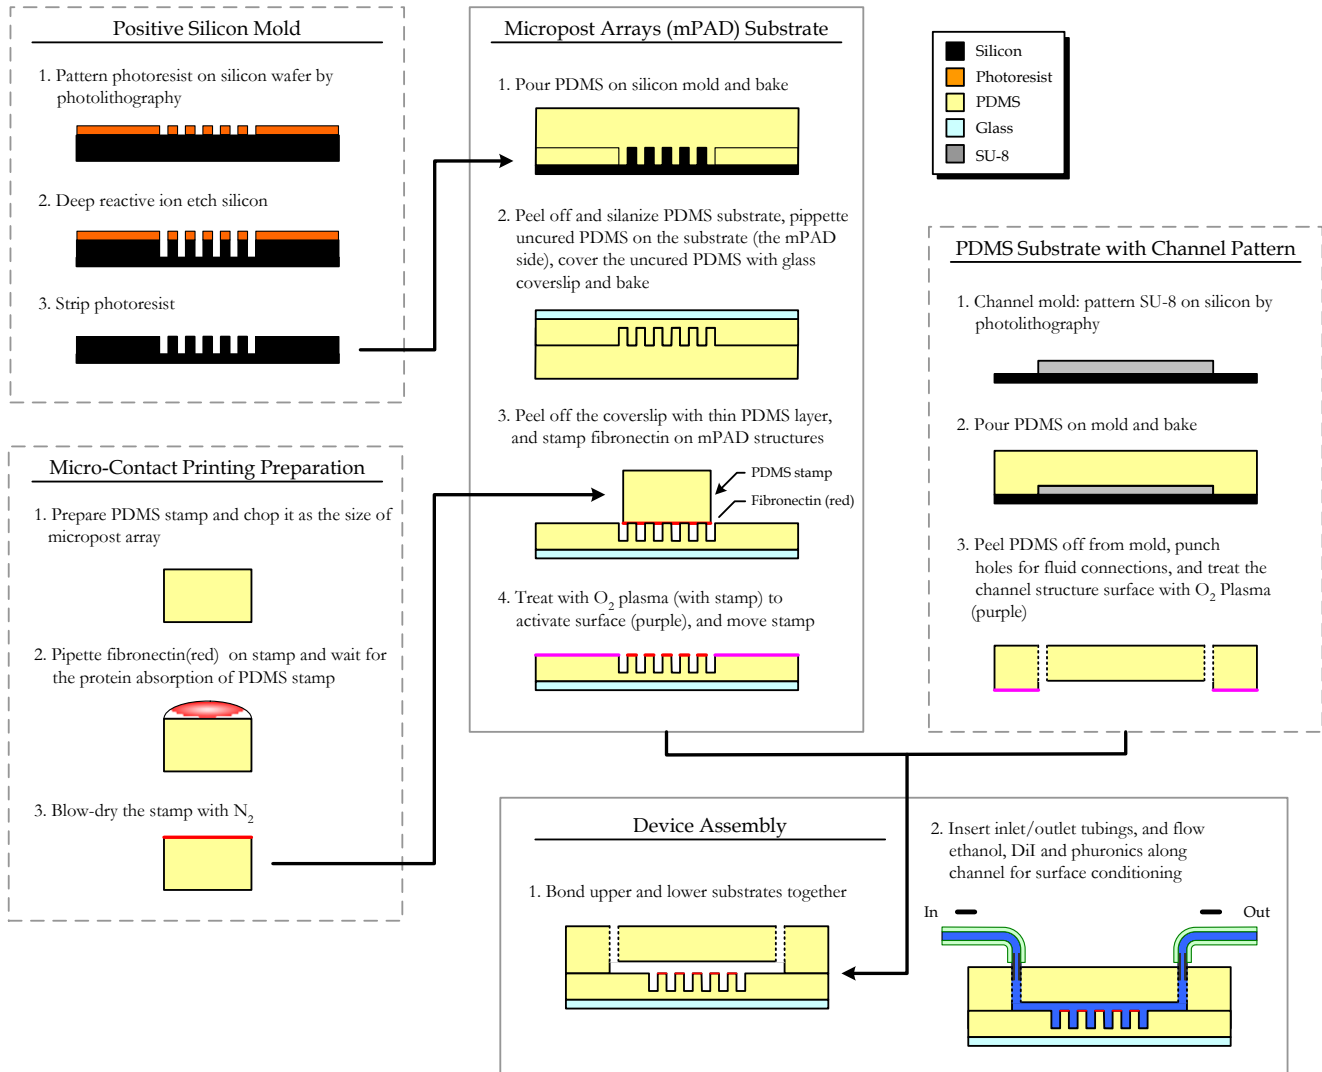

**Fig. S1** Detailed fabrication process for the  $\mu$ PAC device. The detailed experimental procedures and parameters were discussed in **Methods**.

## Supplemental Figure S2

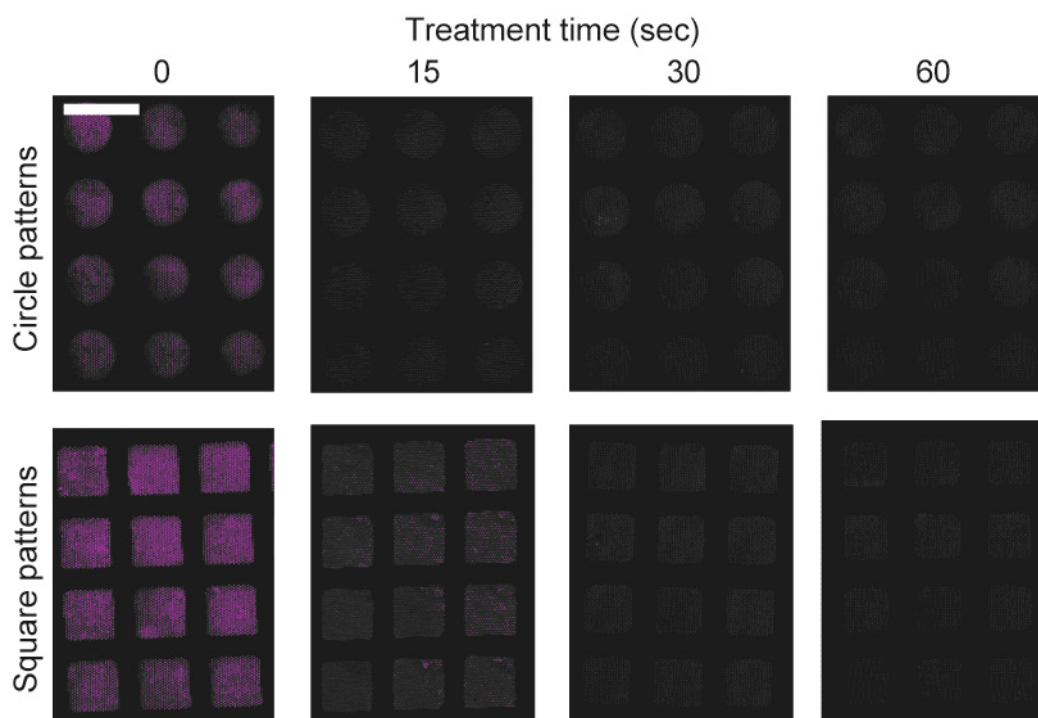

**Fig. S2** Fluorescence images of BSA-coated PDMS microposts after treatments with the oxygen plasma with different durations, as indicated. Other treatment parameters were identical as described in **Methods**. Scale bar, 80  $\mu\text{m}$ .

### Supplemental Figure S3

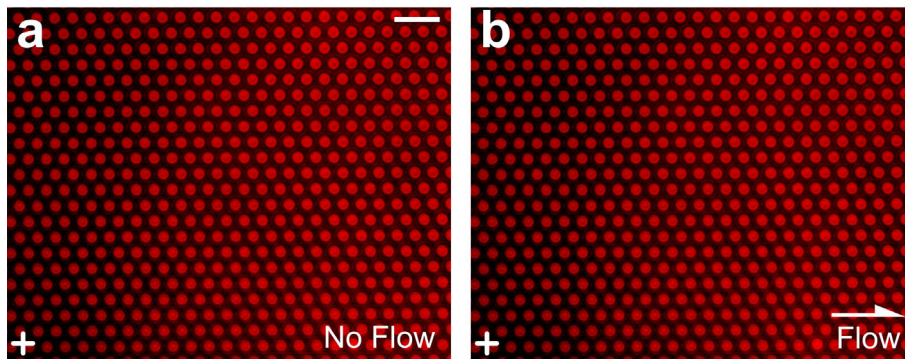

**Fig. S3** Fluorescence images of micropost tops under (a) the static fluid condition and (b) a continuous flow with a shear stress of  $20 \text{ dyne/cm}^2$ . The deflection of the PDMS micropost under the shear stress was not measurable at all. The cross in the images marked an absolute reference location. Scale bar:  $10 \mu\text{m}$ .

## Supplemental Figure S4

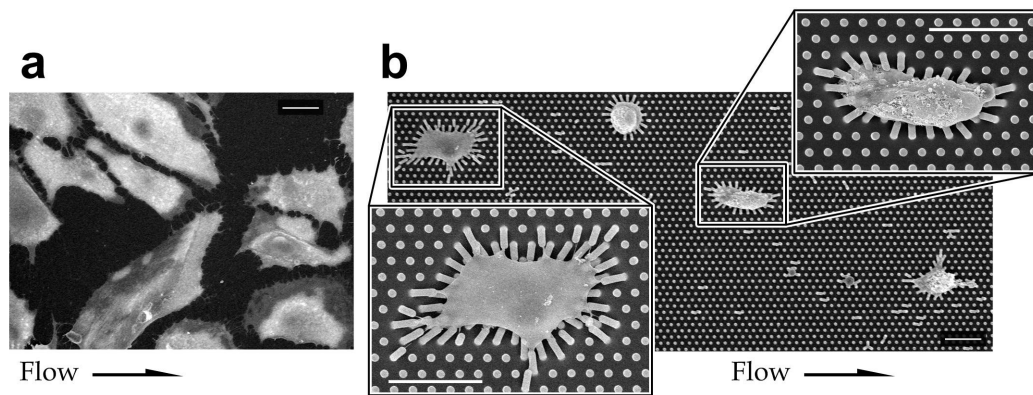

**Fig. S4** SEM images of HUVECs that was aligned in the direction of the flow (**a**: HUVECs on the flat PDMS surface; **b**: HUVECs on the PDMS microposts). Scale bars, 20  $\mu\text{m}$ .

## Supplemental Figure S5

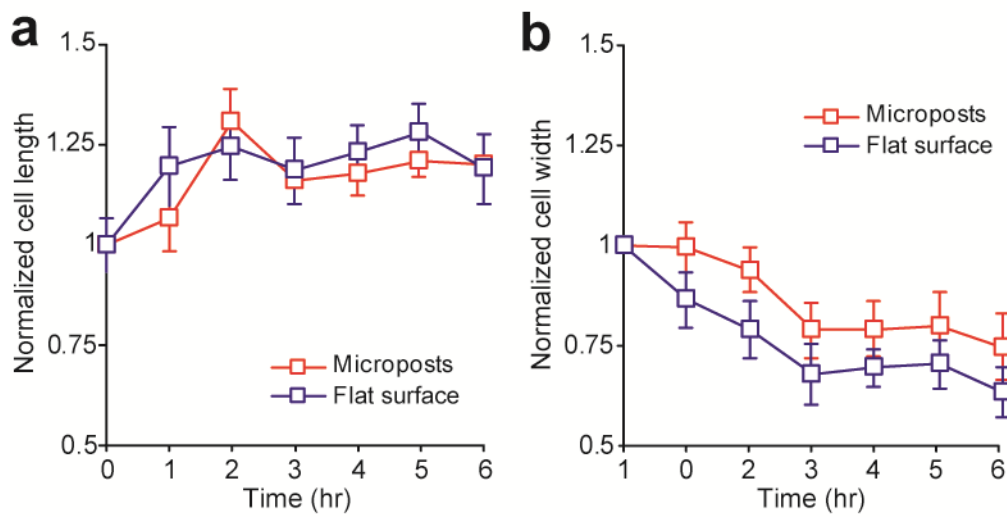

**Fig. S5** Temporal response of the EC morphology during the shearing experiments in terms of the normalized cell length (**a**) and width (**b**) representing the cell dimensions along and perpendicular to the flow direction, respectively.

## Supplemental Figure S6

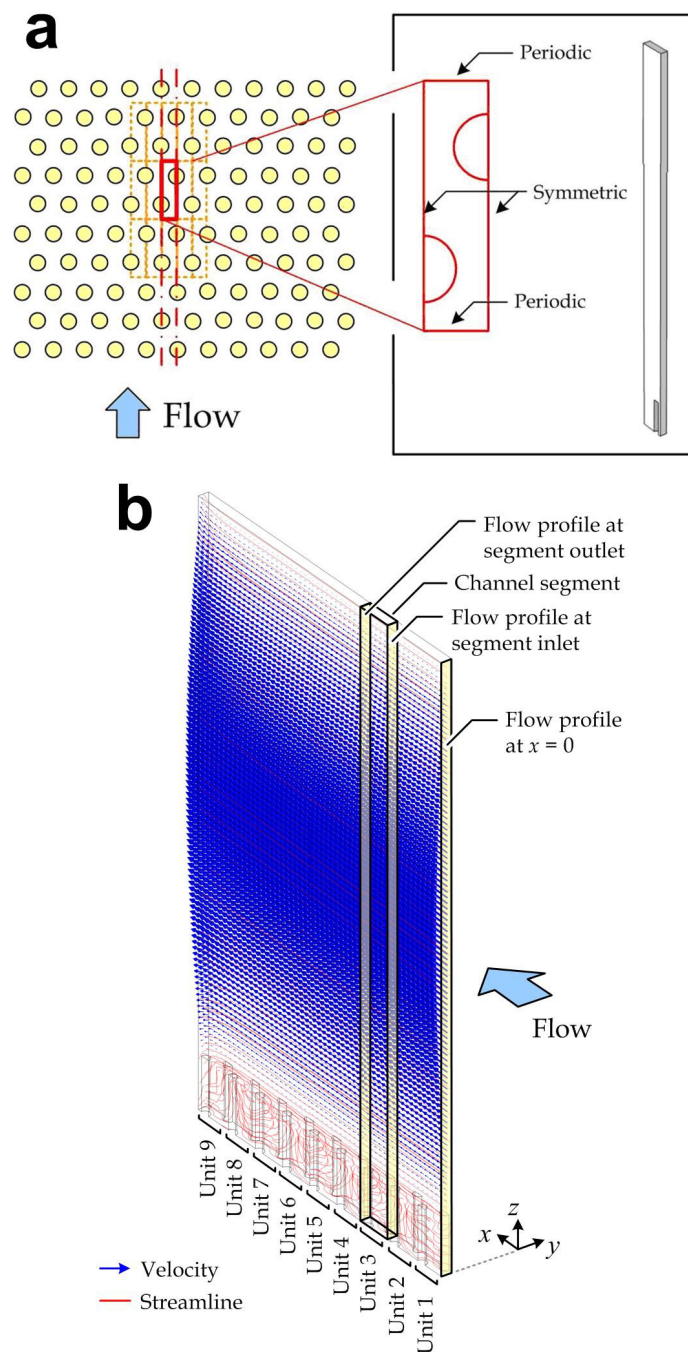

**Fig. S6** (a) A repeating geometrical unit used for flow simulation to study the flow characteristics in the  $\mu$ PAC device. (b) Simulation model containing 9 repeating geometrical units in the flow simulation.

## B. Simulation procedures for flow profile around microposts

Simulation of the flow properties in the  $\mu$ PAC device was performed using the commercial software (COMSOL 4.1) to estimate the shear stress generated on the tops of the PDMS microposts during the device operation. Here we selected a rectangular parallelepiped-shaped repeating element as the simulation unit (with the unit length of 6.93  $\mu\text{m}$ , width of 4  $\mu\text{m}$ , and height of 109  $\mu\text{m}$ ), which was composed of two halves of the PDMS microposts (**Fig. S6a**). The boundary conditions of this simulation unit were: (1) the no-slip boundary condition on all the PDMS surfaces (the tops and shafts of the PDMS microposts and the channel base and ceiling); (2) the symmetric boundary condition on its two side faces; (3) the periodic boundary condition for its entrance and exit faces.

The medium flow rate from the inlet of the  $\mu$ PAC device  $Q$  was set as 0.4 ml/min to establish the targeted shear stress of 20 dyne/cm<sup>2</sup>. Based on simple geometrical arguments, the inlet flow rate  $Q_m$  of the simulation unit was set to  $1.6 \times 10^{-3}$  ml/min. In the computation, a simple model containing 9 repeating simulation units was constructed (**Fig. S6b**). The target simulation unit for calculating the shear stress on the top surface of the PDMS micropost was selected as the ‘unit 3’ in the model, while the other 6 downstream repeating simulation units (unit 4-9 in **Fig. S6b**) were added to capture the disturbing effect caused from the model outlet. The first two boundary conditions described above were achieved by adjusting settings in the COMSOL software, while the periodic boundary condition for the entrance and exit faces of the simulation unit was resolved by iterative simulation procedures described as follows:

1. A uniform velocity profile was first set at the entrance of the 9-unit model along the inlet plane at  $x = 0$ . The velocity profile over the whole 9-unit model was then computed.
2. Starting from the second iteration, the flow profile at the outlet of the ‘unit 3’ was extracted and further used as the flow profile at the entrance of the 9-unit model along the inlet plane at  $x = 0$ . The velocity profile over the whole 9-unit model was then computed.
3. The difference between the flow velocities at the entrance and exit faces of the ‘unit 3’ was calculated. If this difference would lie within a computation tolerance such that the difference of the absolute medium flow rates at the entrance and exit faces of



the ‘unit 3’ would be less than  $10^{-5} \times Q_m$ , we would proceed with step 4, otherwise we would repeat step 2.

4. The entire velocity profile in ‘unit 3’ was exported as the fully developed flow profile. Based on this velocity profile, we further calculated the shear stress at different horizontal planes along the height of the PDMS micropost (**Fig. 3c**).
